# Supplementary material for: Expression of the MHC class II in triple-negative breast cancer is associated with tumor-infiltrating lymphocytes and interferon signaling
Source: PubMed Central journal article supplement (PMC5560630; doi:10.1371/journal.pone.0182786), 2017-08-17

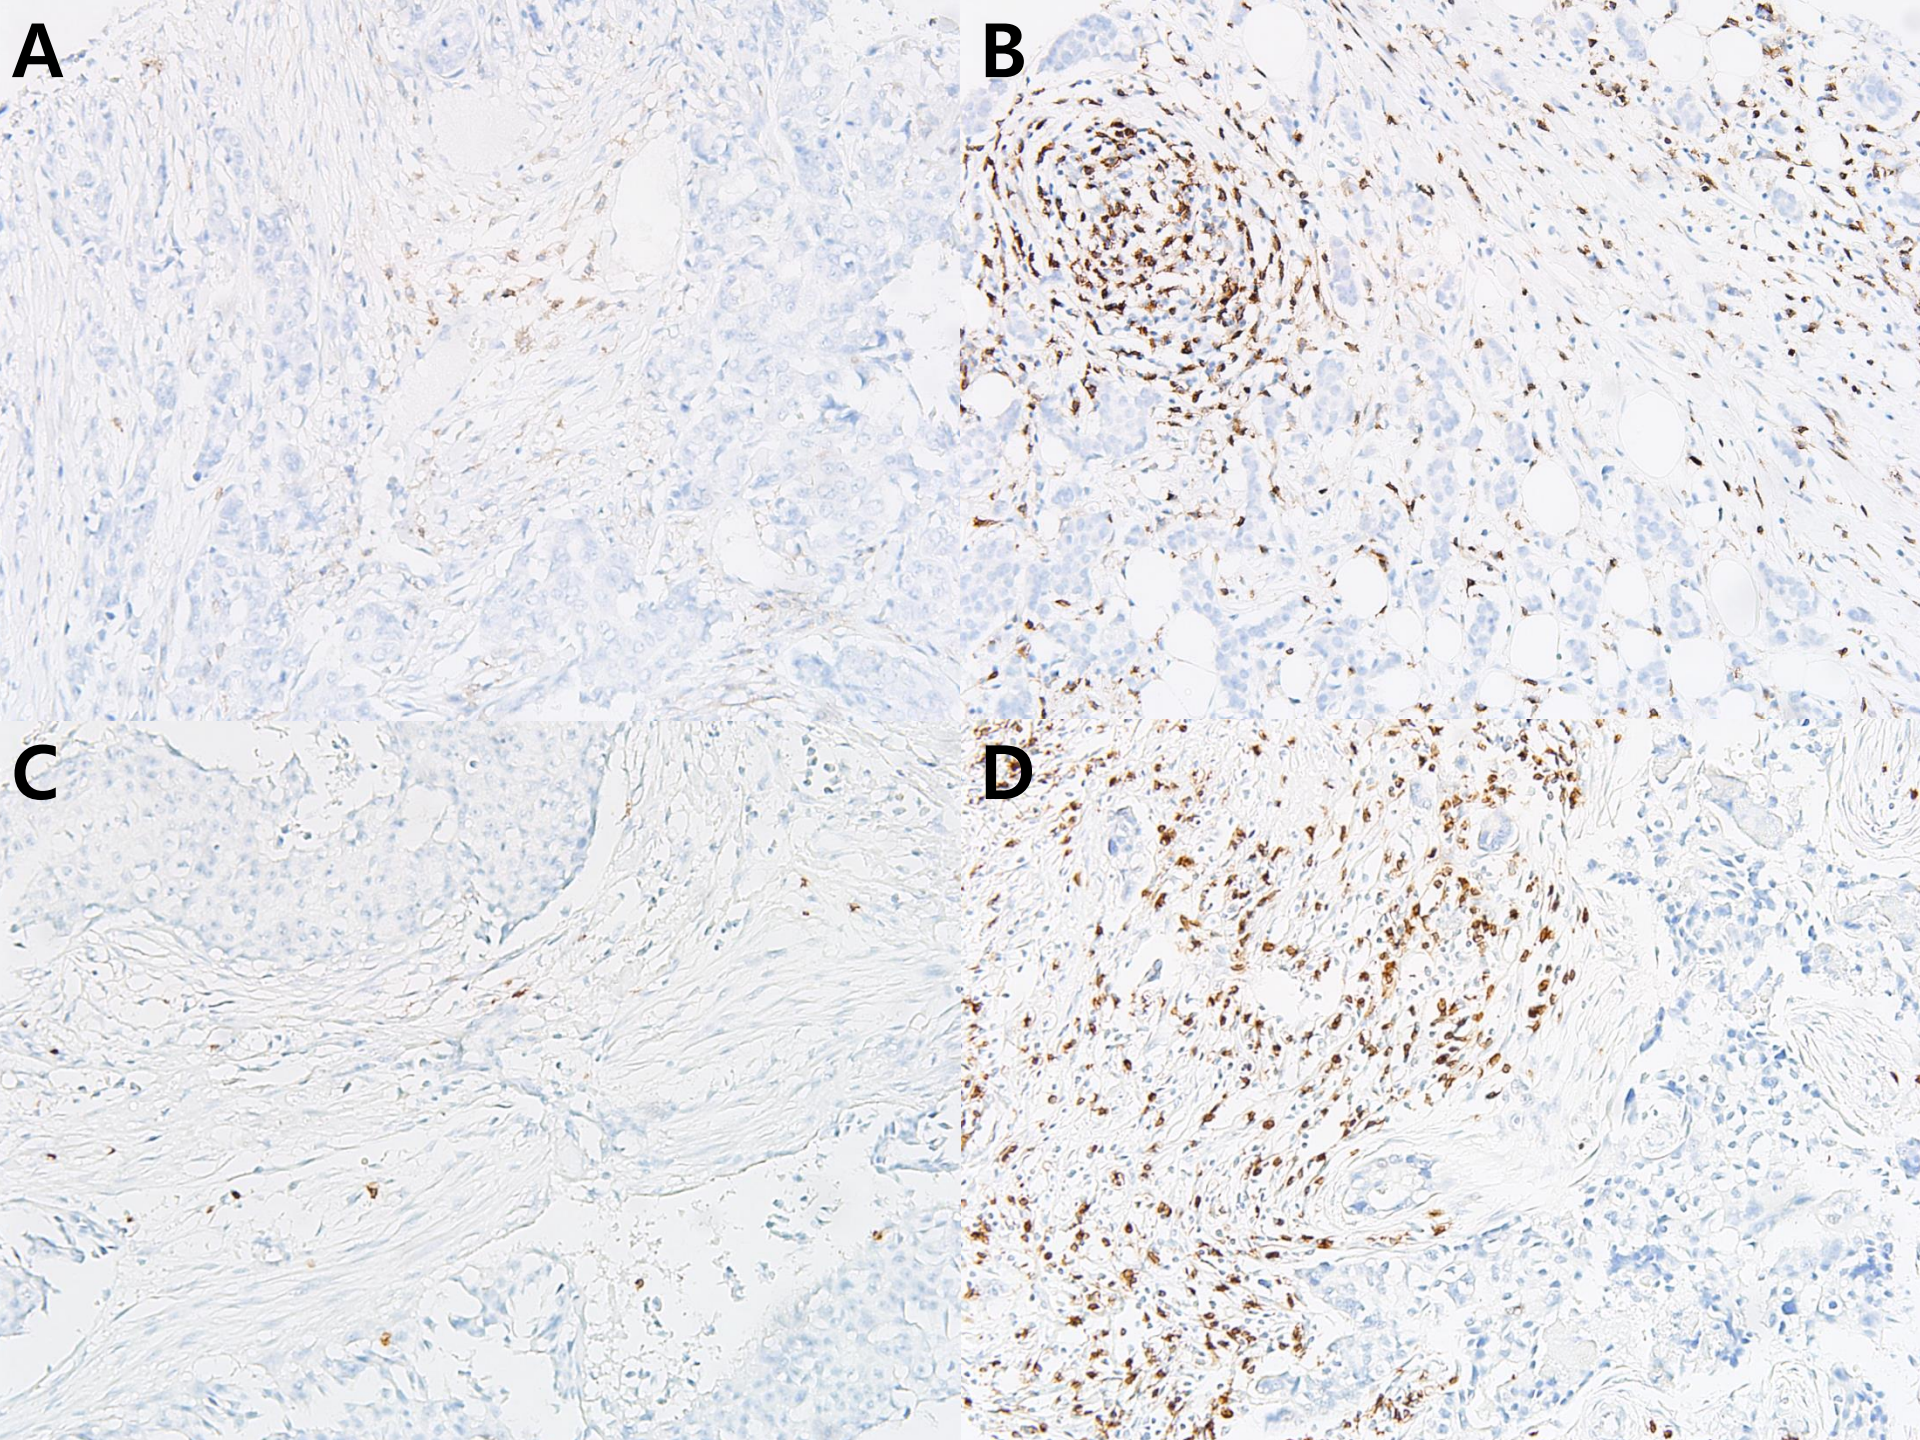

Supplement: pone.0182786.s001.pdf [file pone.0182786.s001.pdf]
